# Supplementary material for: Choice of bacterial DNA extraction method from fecal material influences community structure as evaluated by metagenomic analysis
Source: PubMed Central journal article supplement (PMC4063427; doi:10.1186/2049-2618-2-19), 2014-06-05

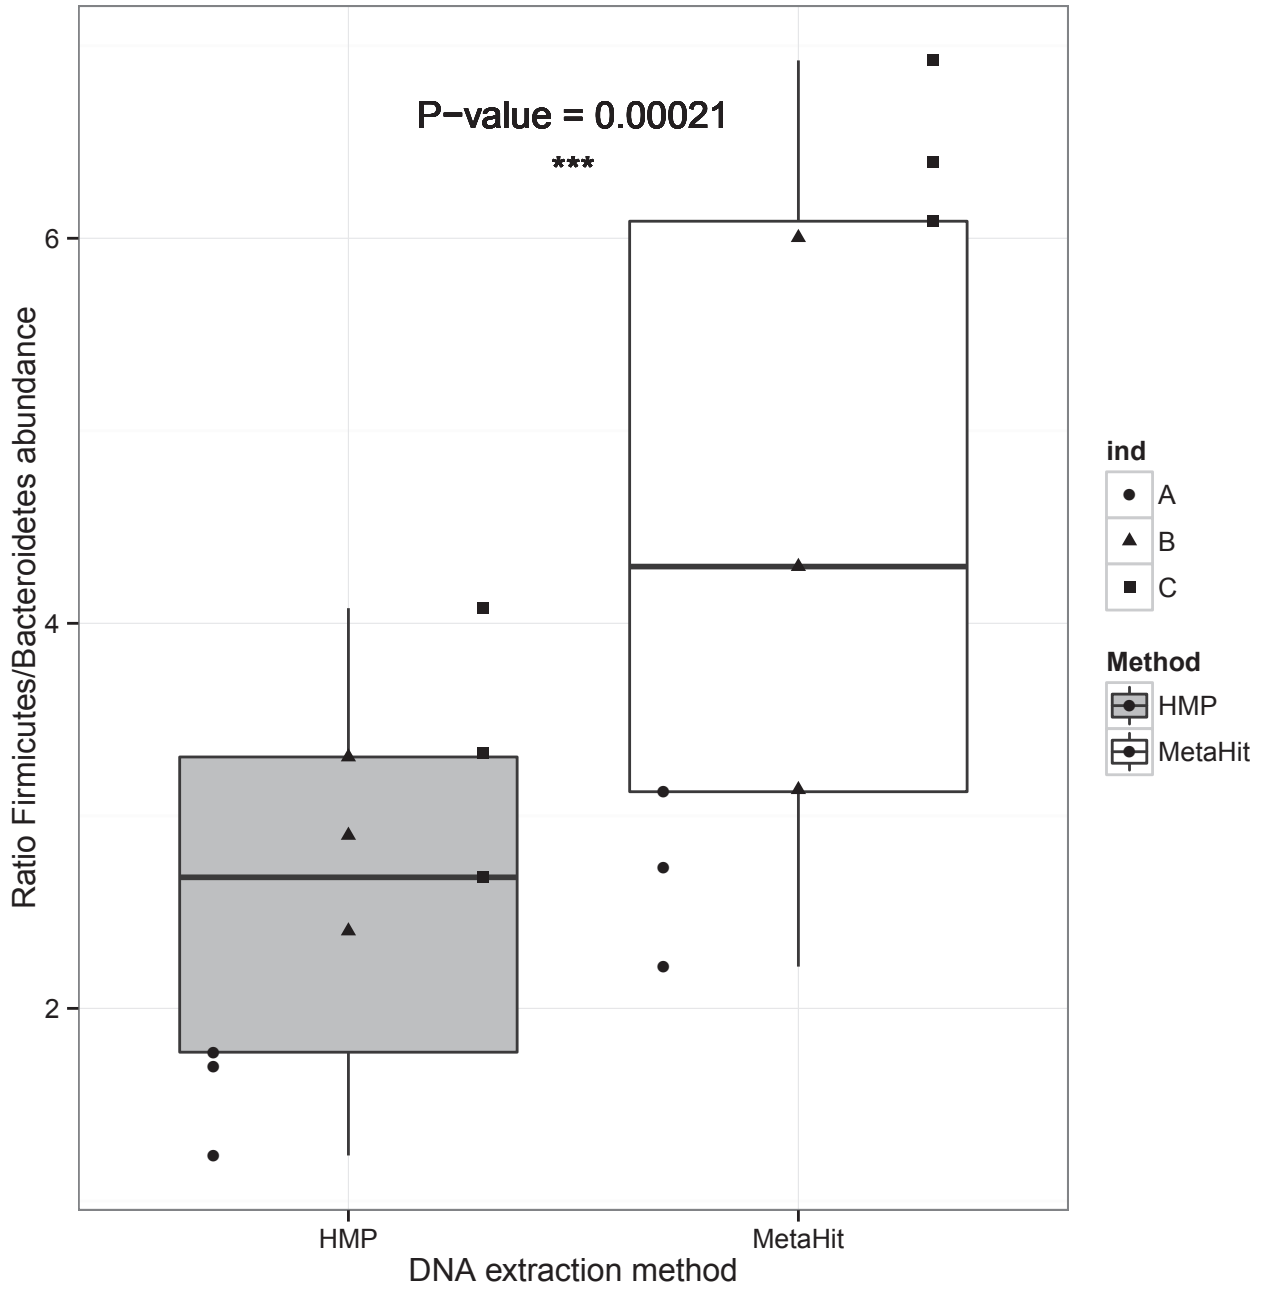

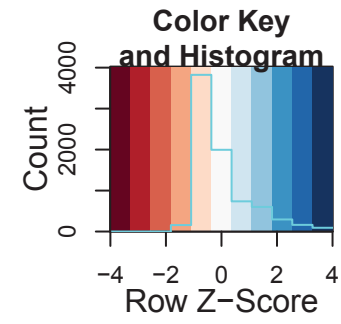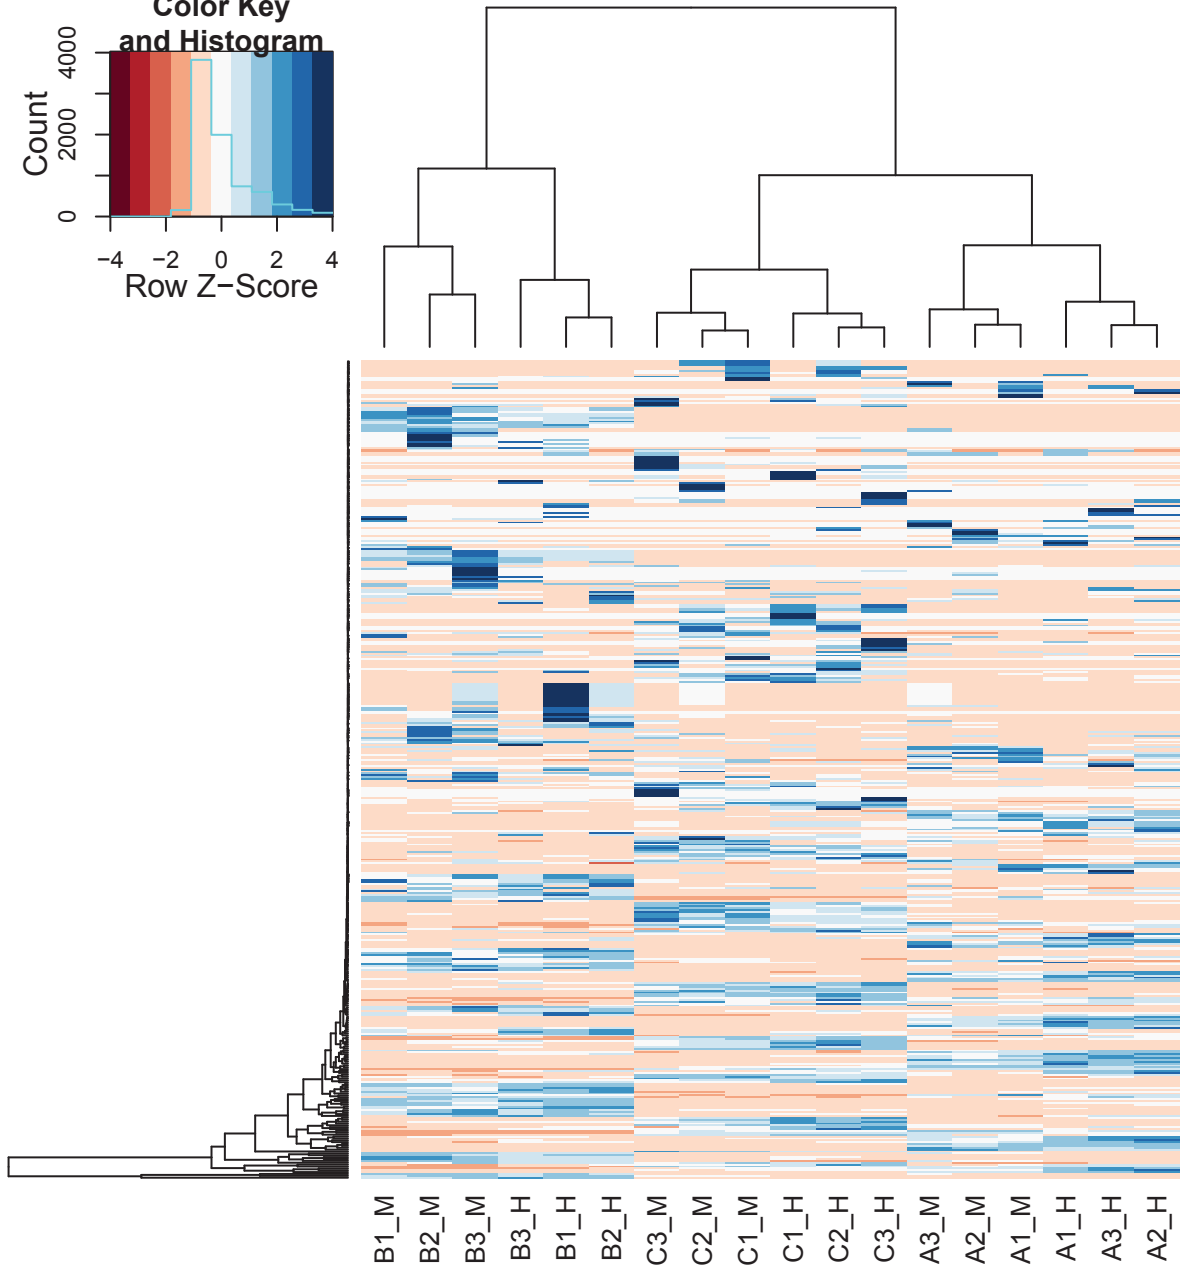

Correlation of bacteria abundance  
 $\rho = 0.97$

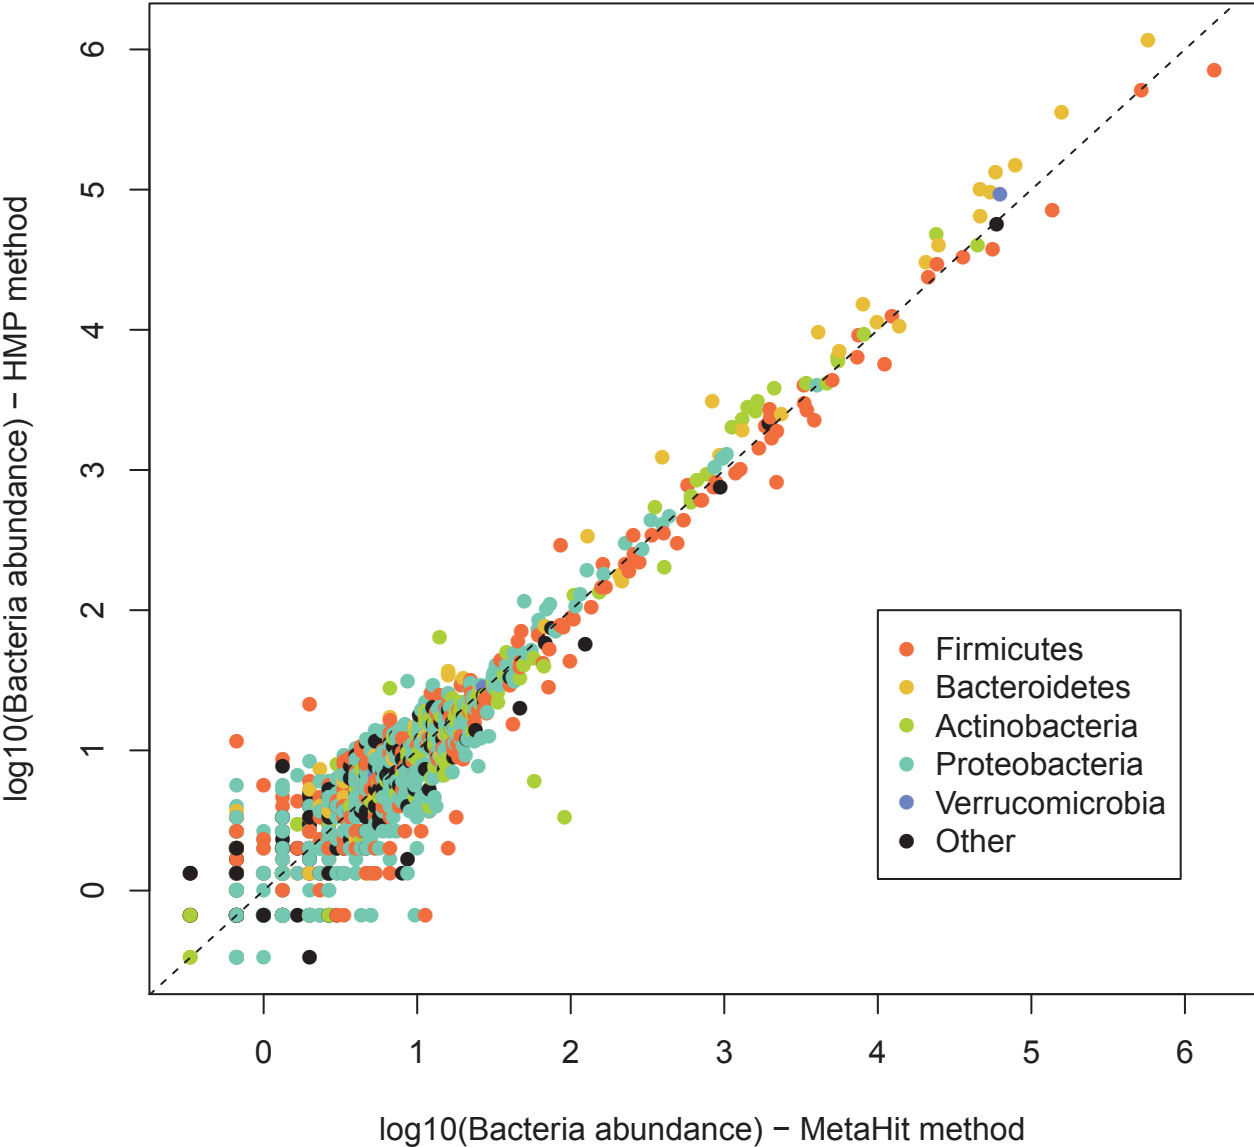

Correlation of gene abundance – Individual A  
 $\rho = 0.94$

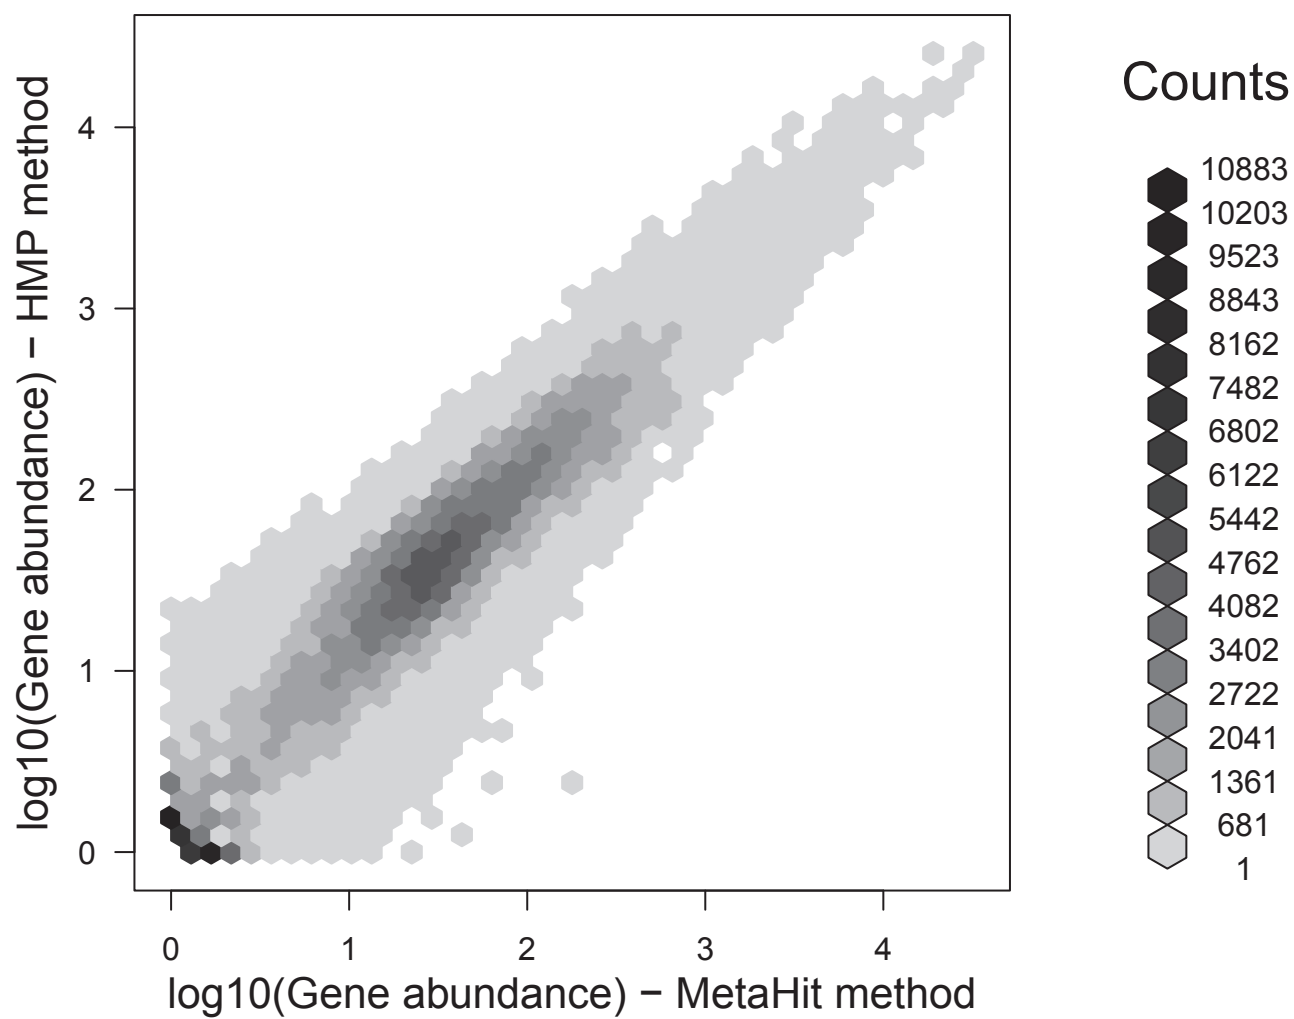

Supplement: 2049-2618-2-19-S2.pdf [file 2049-2618-2-19-S2.pdf]
